# Supplementary material for: All-aqueous core-shell droplets produced in a microfluidic device
Source: Royal Society of Chemistry journal article supplement (doi:10.1039/c1sm06517c), 2011-01-01
Supplement: c1sm06517c.pdf [file c1sm06517c.pdf]

PEG 1

dex 1

outlet

PEG 2

dex 2

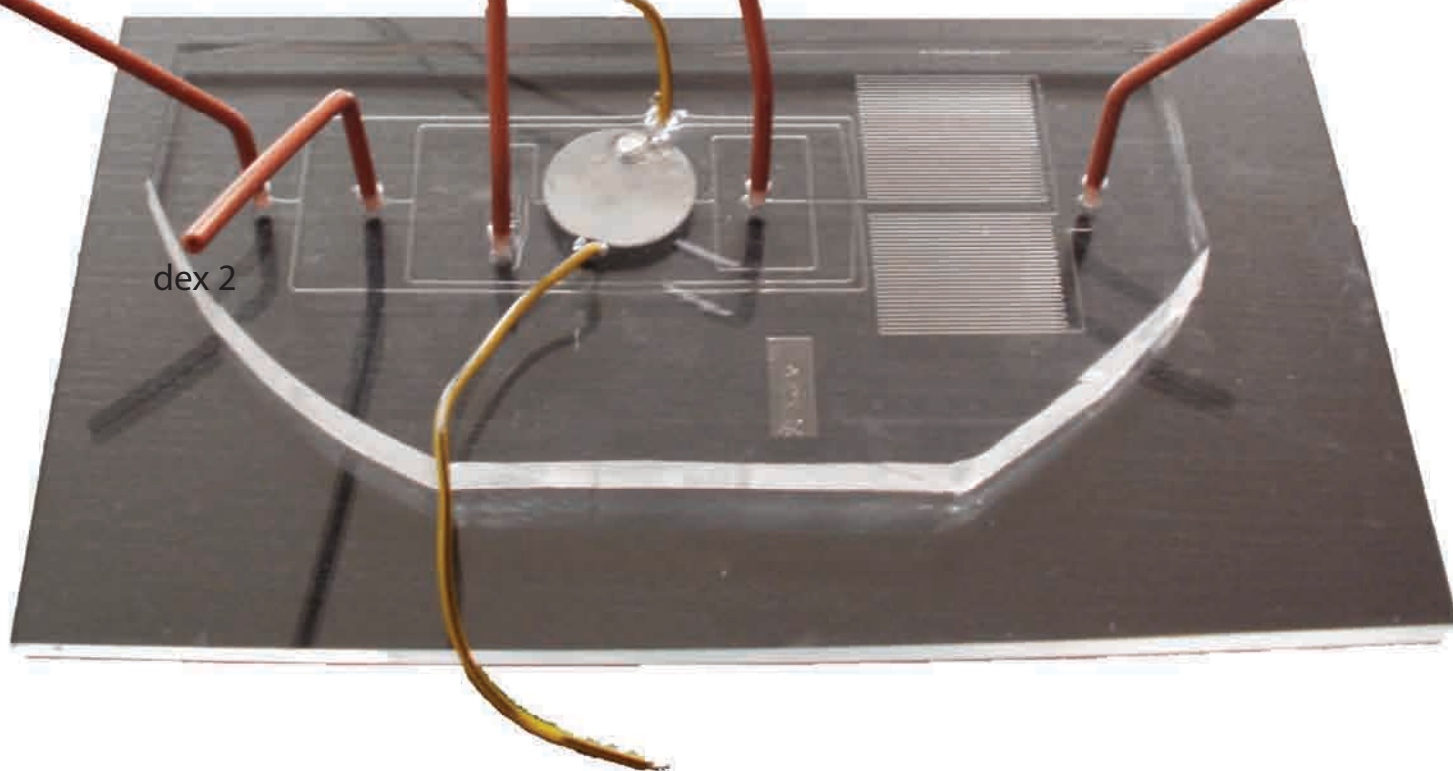

PDMS-on-glass chip used for the forced formation of core-shell double emulsions and aqueous microdrops. Solutions of PEG and dextran are fed into the four orange tubes on the left. Forced formation occurs by the contraction of a piezo electric bending disc embedded in the PDMS, which is actuated by applying a sinusoidal voltage to it through the two yellow wires. After their formation, drops flow through a channel with a length of 80 cm before leaving the device through the exit tube.
